# Supplementary material for: Targeting annexin A7 by a small molecule suppressed the activity of phosphatidylcholine-specific phospholipase C in vascular endothelial cells and inhibited atherosclerosis in apolipoprotein E−/− mice
Source: PubMed Central journal article supplement — Cell Death Dis. 2013 Sep 19;4(9):e806–. doi: 10.1038/cddis.2013.317 (PMC3789175; doi:10.1038/cddis.2013.317), 2013-09-19
Supplement: cddis2013317x1.pdf [file cddis2013317x1.pdf]

## Supplementary informations

### Supplementary Figures

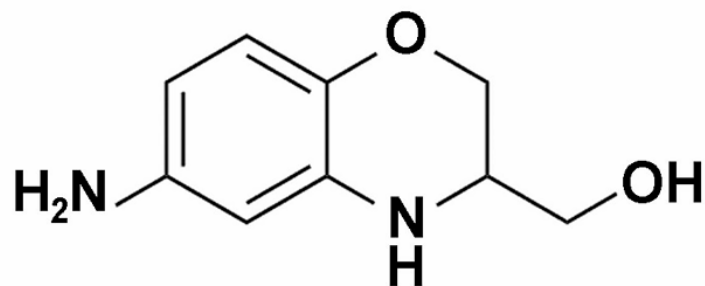

ABO: MW 180

**Fig. S1** Chemical structures of ABO, 6-amino-2,3-dihydro-3-hydroxymethyl-1,4-benzoxazine.

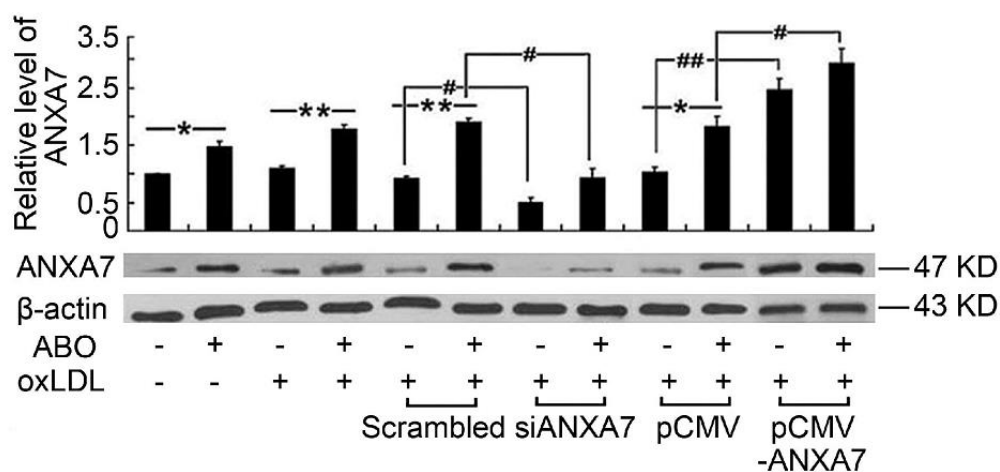

**Fig.S2** Western blot analysis and quantification of ANXA7 protein level. Overexpression (pCVM-ANXA7) and knockdown (siANXA7) of ANXA7 were performed. Protein levels were normalized to that of  $\beta$ -actin. Data are mean  $\pm$  SEM. \*  $p < 0.05$ , \*\*  $p < 0.01$ , #  $p < 0.05$ , ##  $p < 0.01$ ,  $n = 3$ .

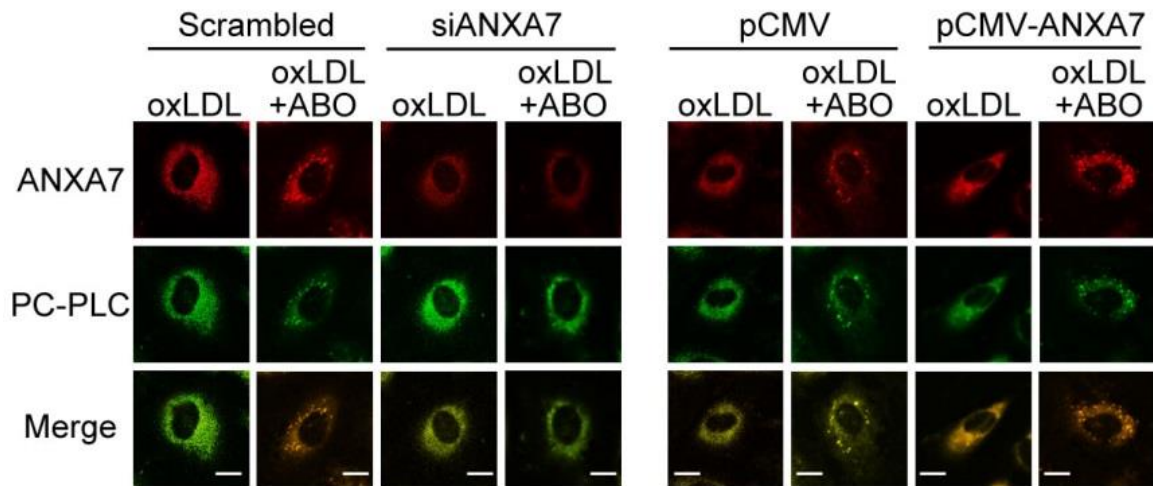

**Fig.S3** Double immunohistochemical staining showed that ANXA7 (red) and PC-PLC (green) exhibited agglomeration and colocalization after different treatment in HUVECs. Overexpression (pCMV-ANXA7) and knockdown (siANXA7) of ANXA7 were performed. Overlays of the red and green signal with a yellow colour indicated co-localization. Bar represents 16  $\mu$ m.

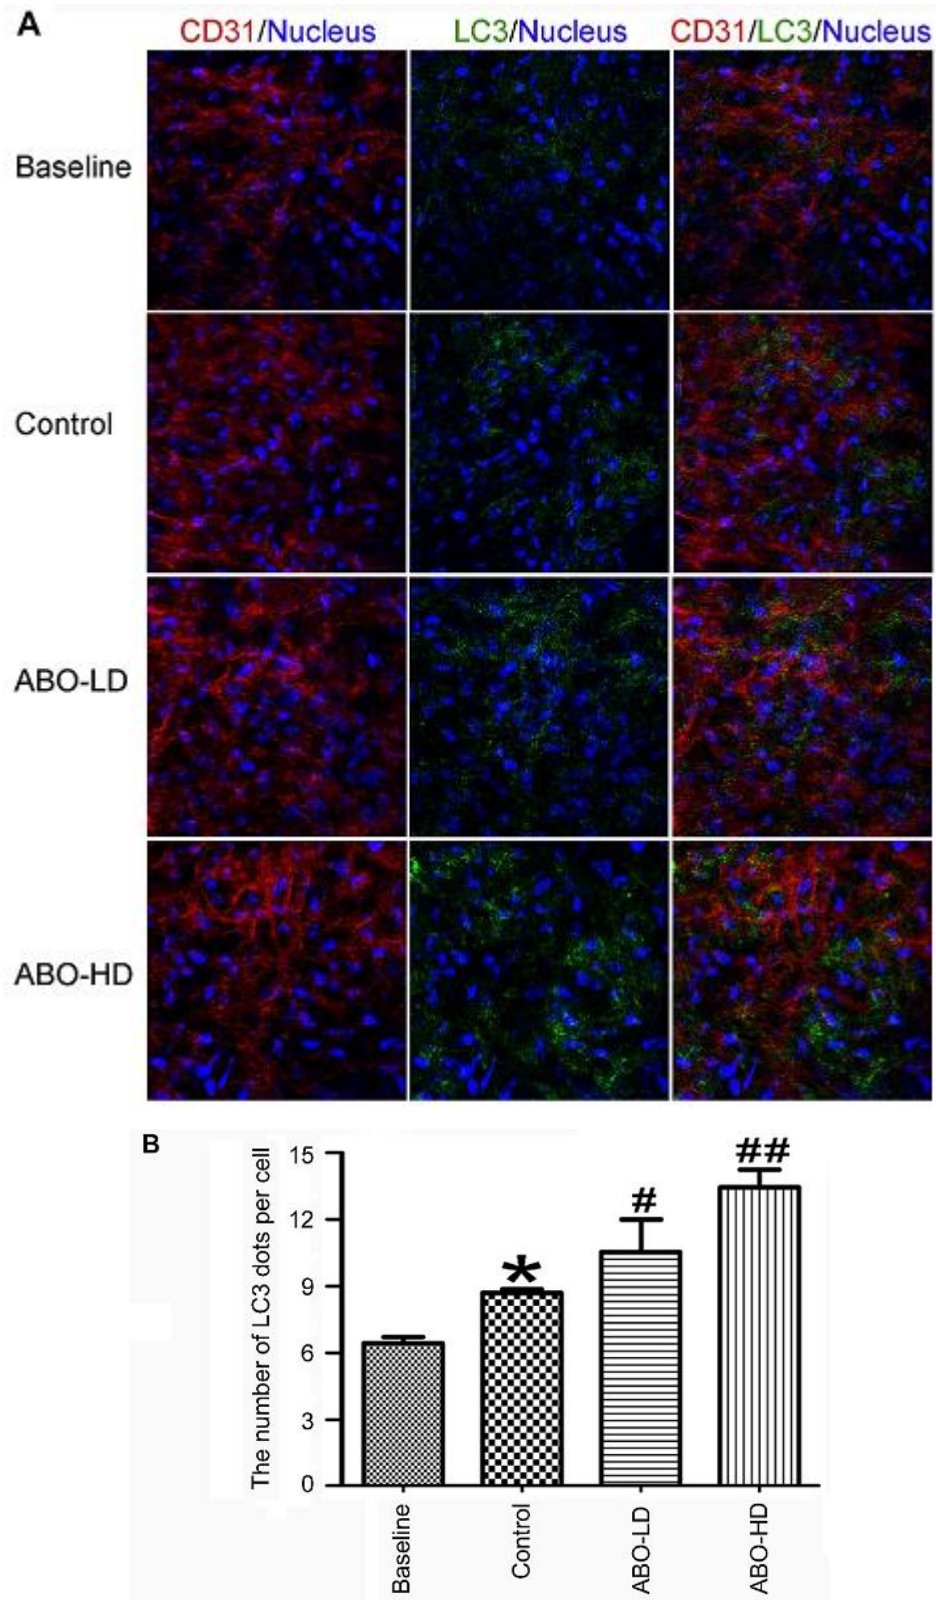

**Fig.S4** Dual immunofluorescence for CD31 and LC3 of en face aortic arch. (A) Confocal images of en face aortic arch labeled with DAPI (blue), rat-anti-CD31 (red) and rabbit-anti-LC3 (green). (B) The bar chart separately showed quantification of

LC3 dots per cell in the endothelium. Data are mean  $\pm$ SEM. \*  $p < 0.05$  vs. baseline, #  $p < 0.05$ , ##  $p < 0.01$  vs. control,  $n = 6$ .

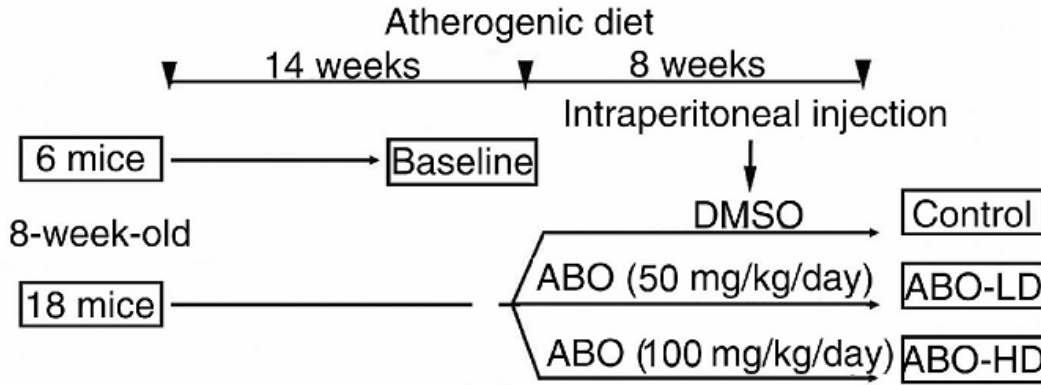

**Fig.S5** Experimental design of 4 experimental protocols. ABO low-dosage: ABO-LD; ABO high-dosage: ABO-HD.

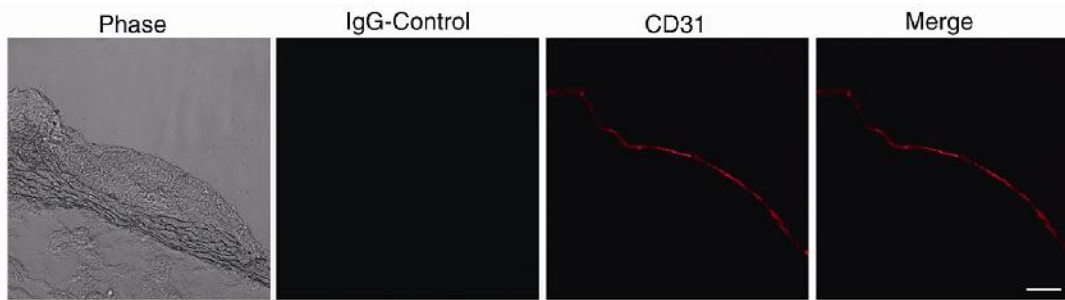

**Fig.S6** The normal rabbit IgG control demonstrated the specificity of the antibody against p62, LC3, ANXA7 and PC-PLC. Bar = 60  $\mu$ m.

**Table S1.** Measurement of organ coefficients of mice after treatment with ABO.

| Groups  | Heart (%)       | Liver (%)       | Spleen (%)      | Lung (%)        | Kidney (%)      | Brain (%)       |
|---------|-----------------|-----------------|-----------------|-----------------|-----------------|-----------------|
| Control | 0.41 $\pm$ 0.03 | 4.85 $\pm$ 0.41 | 0.50 $\pm$ 0.03 | 0.59 $\pm$ 0.01 | 1.21 $\pm$ 0.12 | 0.83 $\pm$ 0.04 |
| ABO-LD  | 0.40 $\pm$ 0.01 | 4.90 $\pm$ 0.40 | 0.53 $\pm$ 0.04 | 0.57 $\pm$ 0.02 | 1.14 $\pm$ 0.11 | 0.86 $\pm$ 0.05 |
| ABO-HD  | 0.41 $\pm$ 0.05 | 4.84 $\pm$ 0.38 | 0.51 $\pm$ 0.02 | 0.61 $\pm$ 0.08 | 1.21 $\pm$ 0.14 | 0.84 $\pm$ 0.09 |
